# Supplementary material
Source: MDPI journal article supplement (https://www.mdpi.com/2311-7524/8/5/407)
Supplement: s1 [file s1]

Table S1 Primers used for the experiment

| Usage                         | Primer name       | Primer Sequence (5'-3')                 |
|-------------------------------|-------------------|-----------------------------------------|
| qRT-PCR                       | qRT-UBI2-F        | GCCCTGGTGCGTTCCCAACTG;                  |
|                               | qRT-UBI2-R        | CCTGCGTGTCTGTCCGCATTG                   |
|                               | qRT-AGL24-F       | CTAGCCCATCTAGTATCCCTCACC                |
|                               | qRT-AGL24-R       | TTCTTTTGTCTGTTCTGGGATGTG                |
|                               | qRT-AG-F          | CCTCCGAGCAAAGATAGCTGATAAT               |
|                               | qRT-AG-R          | GTCAGCAGAAACCAGGCCA                     |
|                               | qRT-ARF3-F        | ATAGTGACAACGACGCAGGG                    |
|                               | qRT-ARF3-R        | GACACACGCAGAACCTGAGA                    |
|                               | qRT-ARF5-F        | CGCGGACAAAGAAACCGATG                    |
|                               | qRT-ARF5-R        | AAGTTCTTGGGTTGGCGGTT                    |
|                               | qRT-ARF18-F       | GTCGTCGTTGTTGTTGGCTC                    |
|                               | qRT-ARF18-R       | AACCGAGGGATTGCGGATT                     |
|                               | qRT-PID-F         | GCGCGTGATTGACAGAGTTC                    |
|                               | qRT-PID-R         | AGTGAGGGCGGATTTCTTGG                    |
| Clone                         | RhAGL24-F         | AACTTAGCAAGCAATCAAACCA                  |
|                               | RhAGL24-R         | AAGTTAGTCACCTTCCAGTCA                   |
|                               | proARF18-F        | GATAGATCCCACTCCTACCCA                   |
|                               | proARF18-R        | TCAAACCAGCAGAGCCAACA                    |
| VIGS                          | pTRV2-AGL24-F     | GTGAGTAAGGTTACCGATGGAAATGAAAATA         |
|                               | pTRV2-AGL24-R     | CGTGAGCTCGGTACCGTGAAAAAGAACTTGAG        |
| Yeast<br>one-<br>hybrid       | pGADT7-AGL24-F    | CCATGGAGGCCAGTGAATTATGAATAAGATAAAGATTG  |
|                               | pGADT7-AGL24-R    | AGCTCGAGCTCGATGGATCCTTAGCCACAGCGAGGAAGC |
|                               | pAbAi-proARF18-F1 | ATTCGAGCTCGGTACCGATAGATCCCACTCCT        |
|                               | pAbAi-proARF18-R1 | TACAGAGCACATGCCTCGAGGACAGGACGGTTATGC    |
|                               | pAbAi-proARF18-F2 | ATTCGAGCTCGGTACCAAGCCAAAAGGAGCGG        |
|                               | pAbAi-proARF18-R2 | TACAGAGCACATGCCTCGAGTCAAACCAGCAGAGCC    |
|                               | pAbAi-proARF18-F3 | ATTCGAGCTCGGTACCTCCTGTCTGTTTAGCC        |
|                               | pAbAi-proARF18-R3 | TACAGAGCACATGCCTCGAGTTGGCTTCTCTCTCTG    |
| Double<br>luciferase<br>assay | SK-AGL24-F        | CGGGCTGCAGGAATTCATGAATAAGATAAAGATT      |
|                               | SK-AGL24-R        | GTACCGAATTGGTACCTTAGCCACAGCGAGGAAG      |
|                               | LUC-ARF18-P1-F    | TCGACGGTATCGATAAGCTTGATAGATCCCACTCCT    |
|                               | LUC-ARF18-P1-R    | GCTCTAGAACTAGTGGATCCTCAAACCAGCAGAGCC    |
